# Supplementary material for: Development of an LC-MS Targeted Metabolomics Methodology to Study Proline Metabolism in Mammalian Cell Cultures
Source: PubMed Central journal article supplement (PMC7587214; doi:10.3390/molecules25204639), 2020-10-12
Supplement: molecules-25-04639-s001.pdf [file molecules-25-04639-s001.pdf]

## Supplementary Materials

### Development of an LC-MS targeted metabolomics methodology to study proline metabolism in mammalian cell cultures

Agnieszka Klupczynska <sup>1,\*†</sup>, Magdalena Misiura <sup>2,†</sup>, Wojciech Miltyk <sup>2</sup>, Ilona Oscilowska <sup>3</sup>, Jerzy Palka <sup>3</sup>, Zenon J. Kokot <sup>4</sup> and Jan Matysiak <sup>1</sup>

<sup>1</sup> Department of Inorganic and Analytical Chemistry, Poznan University of Medical Sciences, 60 -780 Poznan, Poland

<sup>2</sup> Department of Analysis and Bioanalysis of Medicines, Medical University of Bialystok, 15-222 Bialystok, Poland

<sup>3</sup> Department of Medicinal Chemistry, Medical University of Bialystok, 15-222 Bialystok, Poland

<sup>4</sup> Faculty of Health Sciences, State University of Applied Sciences in Kalisz, 62-800 Kalisz, Poland

\* Correspondence: [aklupczynska@ump.edu.pl](mailto:aklupczynska@ump.edu.pl)

† Equal contribution

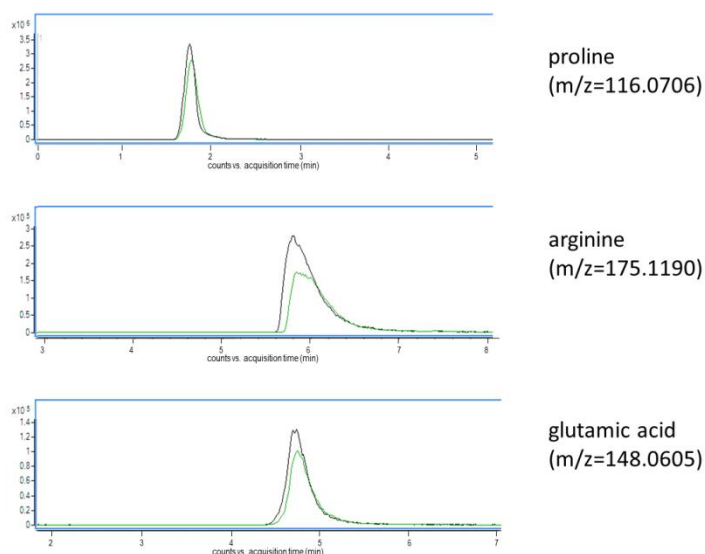

Figure S1. Extracted ion chromatograms of target metabolites obtained using different mobile phase composition. Black color – solvent A: 10 mM ammonium formate with 0.1% formic acid in water; solvent B: acetonitrile. Green color – solvent A: 5 mM ammonium formate with 0.1% formic acid in water; solvent B: acetonitrile.

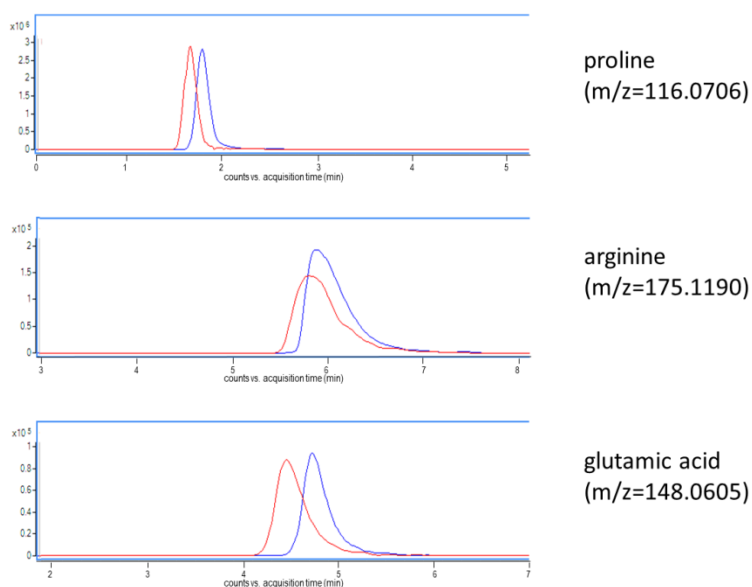

Figure S2. Extracted ion chromatograms of target metabolites obtained using different column temperatures. Blue color - 30°C. Red color - 45°C.

Table S1. Intra-day and inter-day validation of the developed methodology performed using quality control (QC) samples at three different concentration levels. The QC samples were prepared by spiking of a surrogate matrix (1 mg/mL bovine serum albumin in PBS) with standard solutions of analytes.

| Analyte       | Sample    | Conc ( $\mu$ M) | Intra-day (n=5)                          |                              |                         |                   | Inter-day (n=5)                          |                              |                         |                   |
|---------------|-----------|-----------------|------------------------------------------|------------------------------|-------------------------|-------------------|------------------------------------------|------------------------------|-------------------------|-------------------|
|               |           |                 | RT <sup>1</sup> (min), %RSD <sup>2</sup> | Peak area, %RSD <sup>2</sup> | Conc, %RSD <sup>2</sup> | Relative error, % | RT <sup>1</sup> (min), %RSD <sup>2</sup> | Peak area, %RSD <sup>2</sup> | Conc, %RSD <sup>2</sup> | Relative error, % |
| Proline       | QC low    | 5               | 0.57                                     | 2.46                         | 1.90                    | -13.98            | 0.67                                     | 8.72                         | 6.97                    | -10.40            |
|               | QC medium | 15              | 0.39                                     | 3.34                         | 3.23                    | -7.34             | 0.45                                     | 5.37                         | 3.45                    | -5.47             |
|               | QC high   | 25              | 0.48                                     | 2.74                         | 2.79                    | -2.67             | 0.42                                     | 4.20                         | 2.75                    | -2.00             |
| Arginine      | QC low    | 5               | 0.27                                     | 4.12                         | 5.00                    | 13.62             | 0.23                                     | 6.60                         | 8.20                    | 15.17             |
|               | QC medium | 15              | 0.07                                     | 1.39                         | 1.78                    | 3.92              | 0.12                                     | 10.25                        | 8.12                    | 6.87              |
|               | QC high   | 25              | 0.09                                     | 3.45                         | 3.86                    | -3.54             | 0.12                                     | 12.13                        | 10.83                   | 0.08              |
| Glutamic acid | QC low    | 5               | 0.46                                     | 3.52                         | 2.64                    | 1.46              | 0.43                                     | 7.41                         | 7.35                    | -1.44             |
|               | QC medium | 15              | 0.33                                     | 2.88                         | 2.12                    | -11.77            | 0.35                                     | 8.28                         | 8.86                    | -13.04            |
|               | QC high   | 25              | 0.18                                     | 3.37                         | 3.38                    | -10.99            | 0.24                                     | 6.89                         | 7.97                    | -13.88            |

<sup>1</sup> RT – retention time; <sup>2</sup> RSD – relative standard deviation; <sup>3</sup> Conc – concentration value
